# Supplementary material for: Increasing the dyeability of polyester fabrics by photochemical treatment at room-temperature using H2O2in air
Source: Royal Society of Chemistry journal article supplement (doi:10.1039/c4gc01464b), 2014-09-16
Supplement: c4gc01464b1.pdf [file c4gc01464b1.pdf]

**Increasing dyeability of polyester fabrics by photochemical treatment at  
room-temperature using H<sub>2</sub>O<sub>2</sub> in air  
- Supplementary Information-**

Akihiko Ouchi,\* Chuanxiang Liu, and Masao Kunioka

National Institute of Advanced Industrial Science and Technology (AIST), Tsukuba, Ibaraki  
305-8565, Japan

**Contents**

Page S2: **Fig. S1** Emission spectra of a germicidal lamp.

**Fig. S2** UV absorption spectra of Cathilon Blue, Cathilon Red, and hydrazone  
formed by DNPH treatment.

**References**

Page S3: **Fig. S3** Micrograph of photochemically treated PET fabrics.

Page S4: **Fig. S4** Micrograph of photochemically treated cotton fabrics.

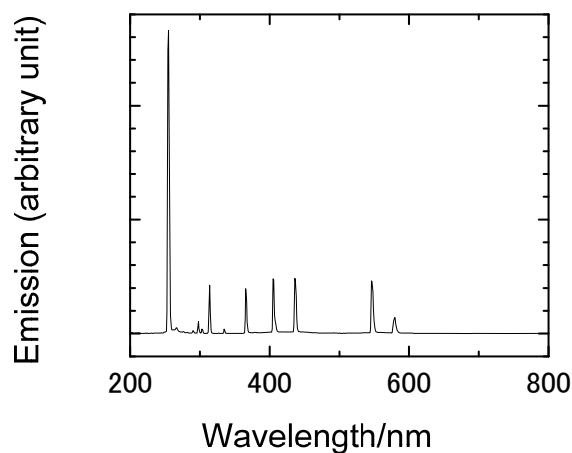

**Fig. S1** Emission spectra of a germicidal lamp.<sup>S1</sup>

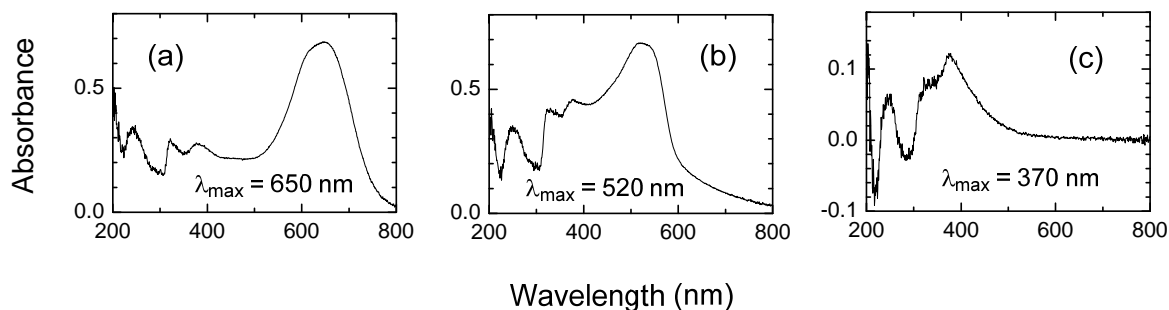

**Fig. S2** UV absorption spectra of (a) Cathilon Blue, (b) Cathilon Red, and (c) hydrazone formed by DNPH treatment. Difference absorption spectra between original PET fabrics and photochemically modified PET fabrics dyed with cationic dyes or treated with DNPH.

## Reference

S1. A. Ouchi, H. Sakai, T. Oishi, T. Hayashi, W. Ando, J. Ito, *Green Chem.*, 2003, **5**, 516–523.

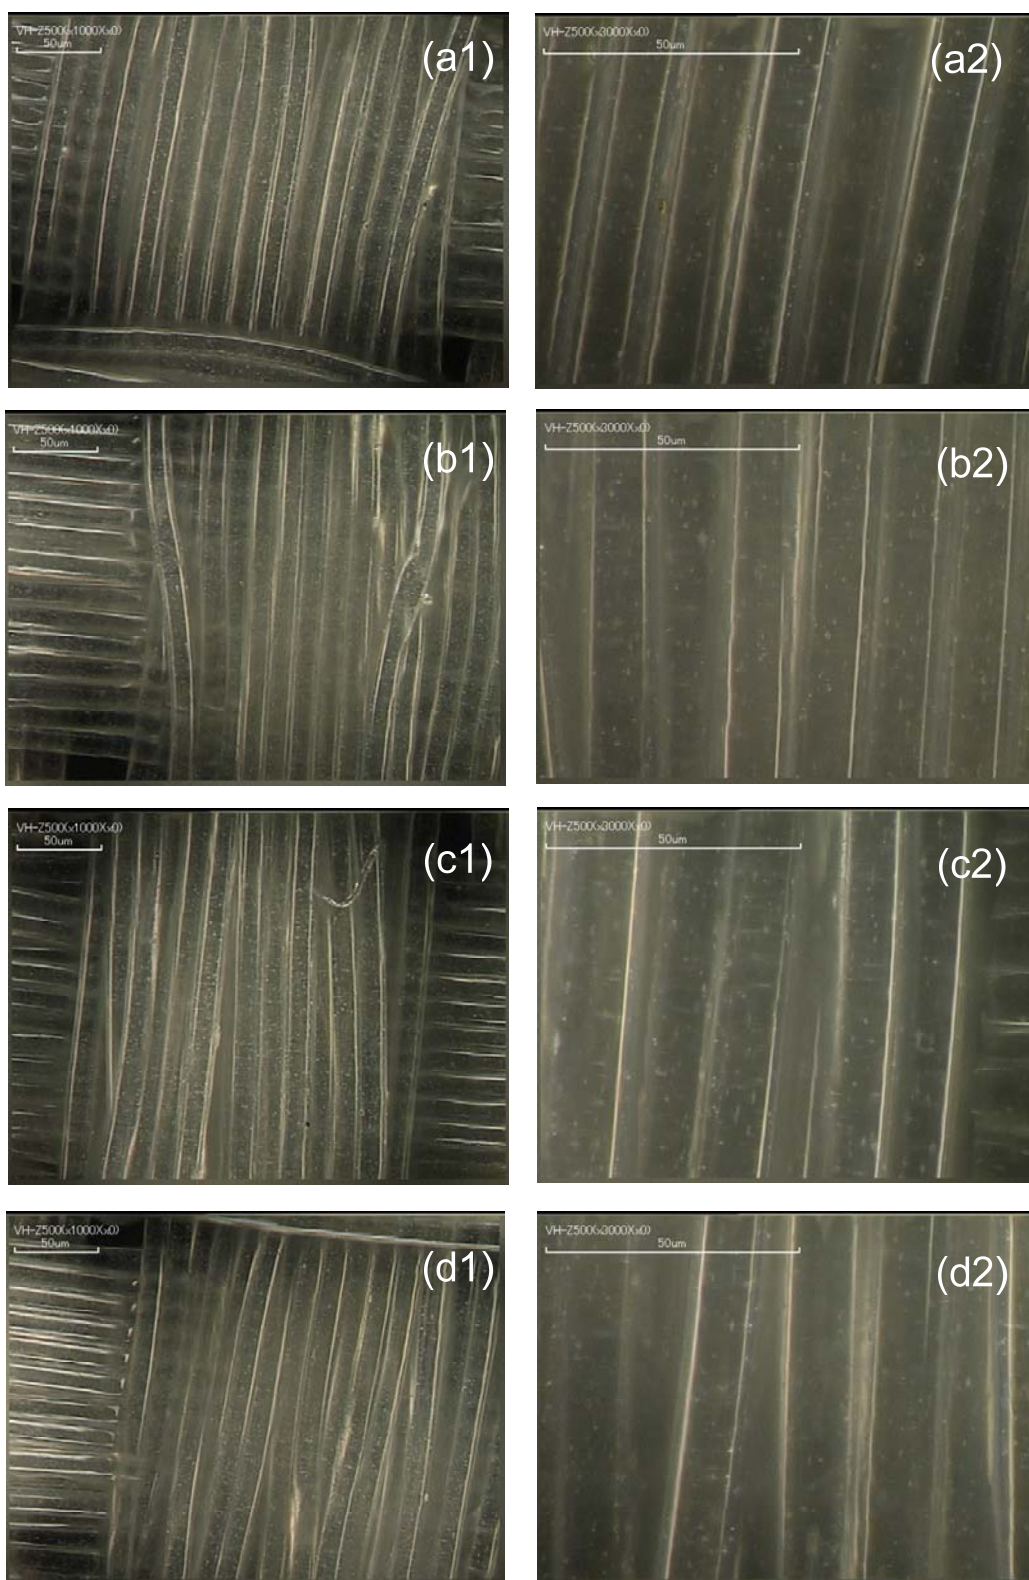

**Fig. S3** Micrograph of photochemically treated PET fabrics. (a) Original fabric and photochemically treated fabric using (b) H<sub>2</sub>O (condition I), (c) 0.5 M H<sub>2</sub>O<sub>2</sub> (condition II), (d) 0.5 M H<sub>2</sub>O<sub>2</sub> + 0.5 M acrylic acid (condition III). Photochemical treatment: germicidal lamp (1.08 mW cm<sup>-2</sup>), 10 min, in air. Scale bars: 50 μm.

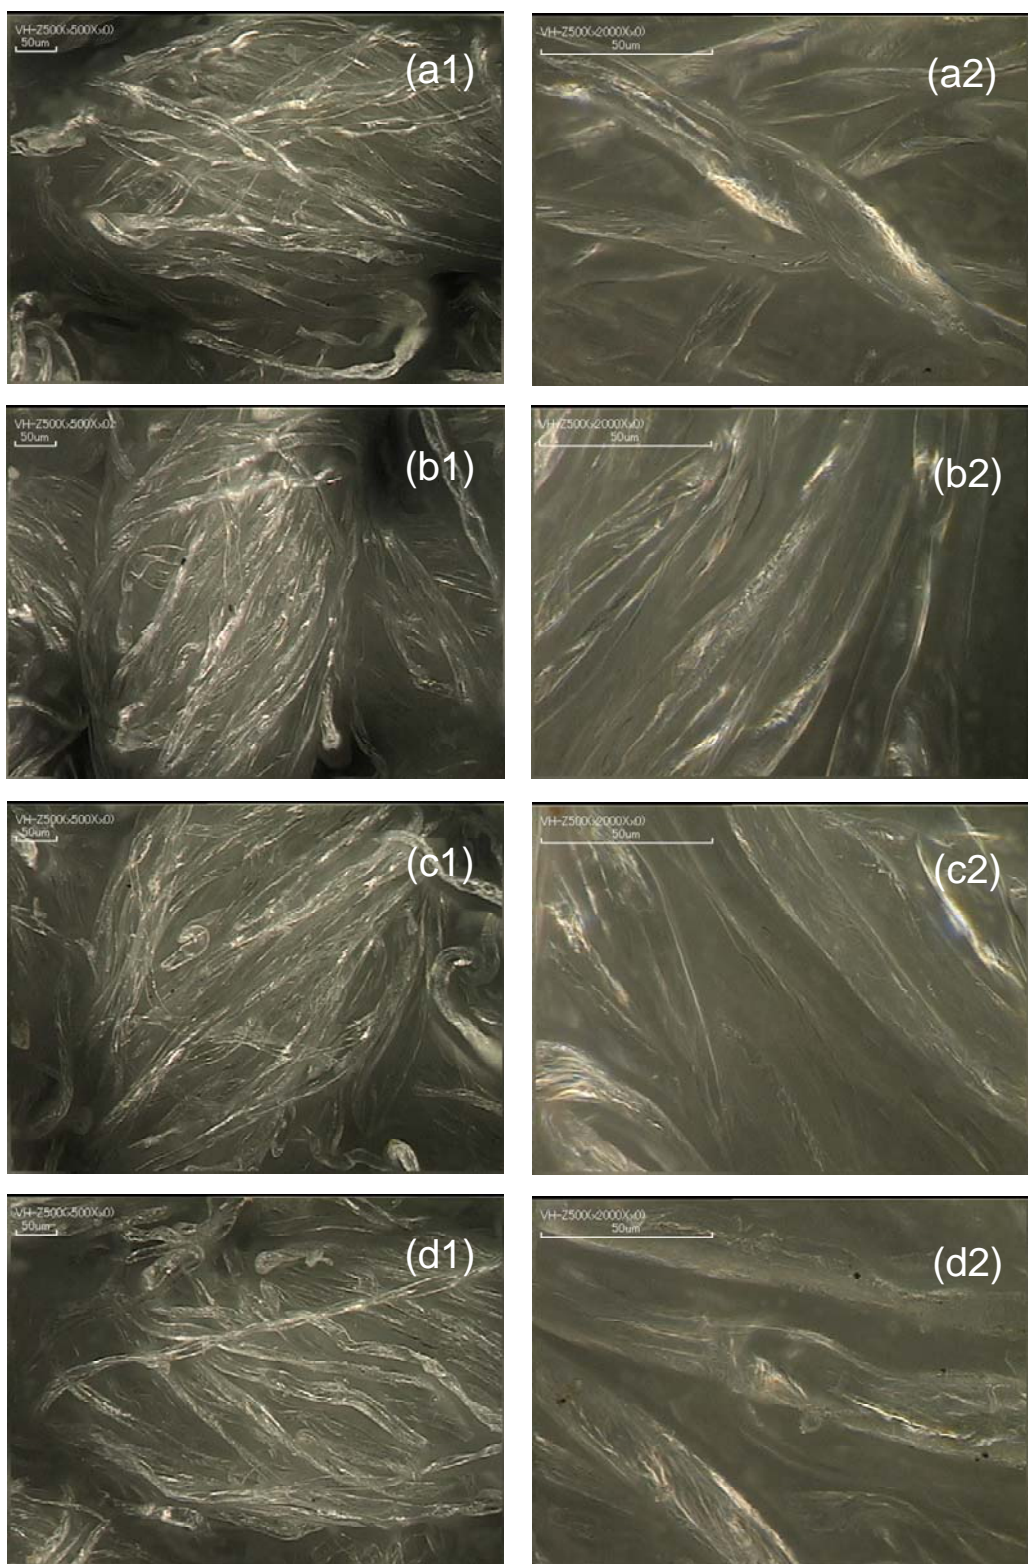

**Fig. S4** Micrograph of photochemically treated cotton fabrics. (a) Original fabric and photochemically treated fabric using (b) H<sub>2</sub>O (condition I), (c) 0.5 M H<sub>2</sub>O<sub>2</sub> (condition II), (d) 0.5 M H<sub>2</sub>O<sub>2</sub> + 0.5 M acrylic acid (condition III). Photochemical treatment: germicidal lamp (1.08 mW cm<sup>-2</sup>), 10 min, in air. Scale bars: 50 μm.
